# Supplementary material
Source: PubMed Central journal article supplement (PMC7749997)
Supplement: NIHMS1654447-supplement-Fig_1_detailed_info.pdf [file NIHMS1654447-supplement-Fig_1_detailed_info.pdf]

## Supporting Information

### **CRISPR-generated *Nrf2a* loss- and gain-of-function mutants facilitate mechanistic analysis of chemical oxidative stress-mediated toxicity in zebrafish**

Margaret G. Mills,<sup>†</sup> Richard Ramsden,<sup>†</sup> Eva Y. Ma,<sup>†</sup> Jone Corrales,<sup>‡</sup> Lauren A. Kristofco,<sup>‡</sup> W. Baylor Steele,<sup>‡</sup> Gavin N Saari,<sup>‡</sup> Fjodor Melnikov,<sup>§</sup> Jakub Kostal,<sup>£</sup> Terrance J. Kavanagh,<sup>†</sup> Julie B. Zimmerman,<sup>§¶</sup> Adelina M. Voutchkova-Kostal,<sup>£</sup> Bryan W. Brooks,<sup>‡</sup> Philip Coish,<sup>§</sup> Paul T. Anastas,<sup>§</sup> Evan Gallagher<sup>†\*</sup>

<sup>†</sup>Department of Environmental and Occupational Health Sciences, School of Public Health, University of Washington, 4225 Roosevelt Way NE, Seattle WA 98105, United States of America

<sup>‡</sup>Department of Environmental Sciences, Baylor University, Baylor Sciences Building, One Bear Place #97266, Waco TX 76798, United States of America

<sup>§</sup>School of Forestry and Environmental Science, Yale University, 195 Prospect St., New Haven CT 06511, United States of America

<sup>£</sup>Department of Chemistry, The George Washington University, Science & Engineering Hall, Suite 4000, 800 22nd St NW, Washington DC 20052, United States of America

<sup>¶</sup>Department of Chemical and Environmental Engineering, Yale University, PO Box 208292, New Haven CT 06520, United States of America

<sup>¢</sup>School of Public Health, Yale University, PO Box 208034, New Haven CT 06520, United States of America

\*Corresponding Author: [evang3@uw.edu](mailto:evang3@uw.edu)

#### Table of Contents

|                                                                                                                           |       |
|---------------------------------------------------------------------------------------------------------------------------|-------|
| A. Figure S1: All chemicals used in the present study . . . . .                                                           | p. S2 |
| B. Figure S2: Independently-isolated <i>nfe2l2a</i> mutant lines encode null (LOF) or hyper-active (GOF) alleles. . . . . | p. S3 |
| C. References. . . . .                                                                                                    | p. S5 |

**Figure S1.**

| Chemical                         | CAS       | Structure                                                                          | LC <sub>50</sub> | DMSO conc. | 40% LC <sub>50</sub> | 20% LC <sub>50</sub> | Gene Expression |             |             |              |              |             |             |             |
|----------------------------------|-----------|------------------------------------------------------------------------------------|------------------|------------|----------------------|----------------------|-----------------|-------------|-------------|--------------|--------------|-------------|-------------|-------------|
|                                  |           |                                                                                    |                  |            |                      |                      | <i>hmx1a</i>    | <i>gclc</i> | <i>gstp</i> | <i>prdx1</i> | <i>gpx1a</i> | <i>ngq1</i> | <i>sod1</i> | <i>sod2</i> |
| Bisphenol A                      | 80-05-7   | 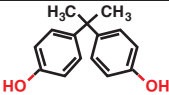  | 12.8             | 0.003%     | 5.11                 | --                   |                 |             |             |              |              |             |             |             |
| <i>R</i> -(-)-Carvone            | 6485-40-1 |   | 58.2             | --         | 23.3                 | 11.6                 |                 | *           | *           | *            |              |             | *           | *           |
| Cumene hydroperoxide             | 80-15-9   |   | 23.4             | 0.00009%   | 9.35                 | 4.68                 |                 | *           | *           | *            | *            | *           |             |             |
| Hydroquinone                     | 123-31-9  |   | 0.24*            | --         | 0.095                | --                   |                 |             |             |              |              |             |             |             |
| Indene                           | 95-13-6   |   | 50.9             | 0.05%      | 20.4                 | --                   | *               | *           |             |              |              | *           | *           |             |
| <i>tert</i> -Butyl hydroperoxide | 75-91-2   |   | 176              | --         | 70.3                 | 35.2                 |                 | *           | *           | *            | *            | *           | *           | *           |
| <i>tert</i> -Butyl hydroquinone  | 1948-33-0 |  | 0.35*            | 0.000002%  | 0.142                | --                   |                 |             | *           | *            |              | *           |             |             |

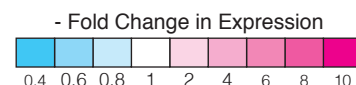

**Figure S1.** All chemicals used in the present study. All concentrations are mg/L. LC<sub>50</sub> concentrations marked with \* were determined for this work whereas all others were identified in ref 1. DMSO concentrations (in % v/v where indicated) are final concentrations in all exposures including the 0 mg/L control. Heat map represents expression changes from exposure to 40% LC<sub>50</sub> for each chemical from 5 hpf to 96 hpf with daily renewal. Asterisks in boxes indicate significantly different expression ( $p < 0.05$ ) relative to untreated controls. Control (untreated) expression in all cases is set to 1.0. All data represent the mean  $\pm$  SEM ( $n = 5$  biological replicates, 10 larvae per replicate).

**Note.** While researchers have used *t*BHQ as a strong activator of Nrf2a in zebrafish,<sup>2-5</sup> we found that effects of *t*BHQ on the Nrf2a-responsive genes *gstp* and *prdx1* were only moderate at 96 hpf relative to other compounds tested. It is likely that the length of exposure used in this study accounted for this difference relative to previous work. For example, *t*BHQ strongly activates Nrf2a under brief 3-6 hr exposures especially at 2 dpf.<sup>5,6</sup> In addition, an *in vivo* study using rat embryos indicated that NRF2 activation by *t*BHQ was greater after acute exposures than subacute exposures.<sup>7</sup> Because our group was examining the effects of several compounds on Nrf2a-dependent gene expression, it was beyond the scope of the study to test the effects of the test agents at multiple time points.

## Figure S2.

### A.

|              |                                                                     |    |
|--------------|---------------------------------------------------------------------|----|
| <i>WT</i>    | <u>GTCTGTTTTCTCTGCAGGACATGGATCTGATCGATATCCTGTGGCGGCAGGATGTGGATC</u> | 60 |
| <i>w210</i>  | GTCTGTTTTCTCTGCAGGACATGGATCTGATCGATATCCTGTGGCGGCAGGATGTGGATC        | 60 |
| <i>w211</i>  | GTCTGTTTTCTCTGCAGGACATGGATCTGATCGATATCCTGTGGCGGCAGGATGTGGATC        | 60 |
| <i>w212</i>  | GTCTGTTTTCTCTGCAGGACATGGATCTGATCGATATCCTGTGGCGGCAGGATGTGGATC        | 60 |
| <i>dw213</i> | GTCTGTTTTCTCT-----                                                  | 13 |
| <i>dw214</i> | GTCTGTTTTCTCTGCAGGACATGGATCTGATCGATATCCTGTGGCGGCAGGATGTGGATC        | 60 |

|              |                                                                       |     |
|--------------|-----------------------------------------------------------------------|-----|
| <i>WT</i>    | <u>TGGGCGCGGGCCGTGAGGTGTTTCGACTTCAGCTACCGGCAGAAGGAGGTGGAGCTGCGCA</u>  | 120 |
| <i>w210</i>  | TGGGC----- <b>TCGTGAGGTGTTTCGACTTCAGCTACCGGCAGAAGGAGGTGGAGCTGCGCA</b> | 115 |
| <i>w211</i>  | TGGGCGCGGGCCGTGAGGTGTTTCGACTTCAGCTACCGGCAGAAGGAGGTGGAGCTGCGCA         | 120 |
| <i>w212</i>  | TGGGCGC-----                                                          | 67  |
| <i>dw213</i> | -----                                                                 | 13  |
| <i>dw214</i> | TGGGCGCGGGC-----                                                      | 71  |

|              |                                                                     |     |
|--------------|---------------------------------------------------------------------|-----|
| <i>WT</i>    | <u>GGCGGAGGGAGCAGGAGGAGCAGGAGCTGCAGGAGCGTCTGCAGGAGCAGGAGAAGACAC</u> | 180 |
| <i>w210</i>  | GGCGGAGGGAGCAGGAGGAGCAGGAGCTGCAGGAGCGTCTGCAGGAGCAGGAGAAGACAC        | 175 |
| <i>w211</i>  | GGCGGAGGGAGCAGGAGGAGCAGGAGCTGCAGGAGCGTCTGCAGGAGCAGGAGAAGACAC        | 180 |
| <i>w212</i>  | -----                                                               | 67  |
| <i>dw213</i> | -----GCGTCTGCAGGAGCAGGAGAAGACAC                                     | 39  |
| <i>dw214</i> | -----                                                               | 71  |

|              |                                                                            |     |
|--------------|----------------------------------------------------------------------------|-----|
| <i>WT</i>    | <u>TGCTGGCTCAGCTGCAGCTCGACGAGGAGACCGGAGAGTTCCTG<u>CCGCGCAGCACACCGC</u></u> | 240 |
| <i>w210</i>  | TGCTGGCTCAGCTGCAGCTCGACGAGGAGACCGGAGAGTTCCTG <u>CCGCGCAGCACACCGC</u>       | 235 |
| <i>w211</i>  | TGCTGGCTCAGCTGCAGCTCGACGAGGAGACCGG----- <b>TCGGCACACCGC</b>                | 226 |
| <i>w212</i>  | -----                                                                      | 67  |
| <i>dw213</i> | TGCTGGCTCAGCTGCAGCTCGACGAGGAGACCGGAGAGTTCCTG <u>CCGCGCAGCACACCGC</u>       | 99  |
| <i>dw214</i> | -----ACACCGC                                                               | 78  |

|              |                                                                     |     |
|--------------|---------------------------------------------------------------------|-----|
| <i>WT</i>    | <u>TCACACACACACCTGAAGCAGACGGAGGAGGAGCGGGAGAAATCACACAGGTACACATGC</u> | 300 |
| <i>w210</i>  | TCACACACACACCTGAAGCAGACGGAGGAGGAGCGGGAGAAATCACACAGGTACACATGC        | 295 |
| <i>w211</i>  | TCACACACACACCTGAAGCAGACGGAGGAGGAGCGGGAGAAATCACACAGGTACACATGC        | 286 |
| <i>w212</i>  | TCACACACACACCTGAAGCAGACGGAGGAGGAGCGGGAGAAATCACACAGGTACACATGC        | 127 |
| <i>dw213</i> | TCACACACACACCTGAAGCAGACGGAGGAGGAGCGGGAGAAATCACACAGGTACACATGC        | 159 |
| <i>dw214</i> | TCACACACACACCTGAAGCAGACGGAGGAGGAGCGGGAGAAATCACACAGGTACACATGC        | 138 |

### B.

|              |    |                                                                                        |    |
|--------------|----|----------------------------------------------------------------------------------------|----|
| <i>WT</i>    | 15 | DMDLIDILWRQD <u>VDL</u> GAGREVFDFSYR <u>Q</u> KEVELRRRREQEEQELQERLQEQEK <u>TLLAQLQ</u> | 75 |
| <i>w210</i>  | 15 | DMDLIDILWRQD <u>VDLGS</u> *                                                            | 32 |
| <i>w211</i>  | 15 | DMDLIDILWRQD <u>VDL</u> GAGREVFDFSYR <u>Q</u> KEVELRRRREQEEQELQERLQEQEK <u>TLLAQLQ</u> |    |
| <i>w212</i>  | 15 | DMDLIDILWRQD <u>VDLGAHTHT</u> *                                                        | 36 |
| <i>dw213</i> | 15 | -----EQEK <u>TLLAQLQ</u>                                                               | 26 |
| <i>dw214</i> | 15 | DMDLIDILWRQD <u>VDL</u> GAG-----                                                       | 33 |

|       |                                         |     |
|-------|-----------------------------------------|-----|
| WT    | <u>LDEETGE</u> FLPRSTPLTHTPEADGGGAGEITQ | 106 |
| w210  | ---                                     | 32  |
| w211  | <u>LDEETGR</u> <b>HTAHTHT</b> *         | 89  |
| w212  | ---                                     | 36  |
| dw213 | <u>LDEETGE</u> FLPRSTPLTHTPEADGGGAGEITQ | 57  |
| dw214 | -----TPLTHTPEADGGGAGEITQ                | 52  |

**Figure S2.** Independently-isolated *nfe2l2a* mutant lines encode null (LOF) or hyperactive (GOF) alleles. (a) Genomic sequences of Intron 1 (grey letters) and Exon 2 (black letters) for wild type and five mutant alleles show deletions (dashes) and insertions (bold text) near CRISPR guide sites (underlined in wild type, with PAM sites double underlined). (b) Protein sequences predicted from Exon 2 cDNA show that three out-of-frame deletions result in putative LOF alleles with altered amino acids (bold) and novel stop codons (\*), while the two in-frame deletions result in putative GOF alleles by removing of some or all of the DLG and ETGE motifs bound by Keap1 (underlined) and lysine residues that are targets of ubiquitination (double underline).

## References.

- (1) Corrales, J., Kristofco, L. A., Steele, W. B., Saari, G. N., Kostal, J., Williams, E. S., Mills, M., Gallagher, E. P., Kavanagh, T. J., Simcox, N., Shen, L. Q., Melnikov, F., Zimmerman, J. B., Voutchkova-Kostal, A. M., Anastas, P. T., and Brooks, B. W. (2017) Toward the design of less hazardous chemicals: exploring comparative oxidative stress in two common animal models. *Chem. Res. Toxicol.* *30*, 983-994.
- (2) Li, L., Kobayashi, M., Kaneko, H., Nakajima-Takagi, Y., Nakayama, Y., and Yamamoto, M. (2008) Molecular evolution of Keap1. *Journal of Biological Chemistry* *283*, 3248-55.
- (3) Kobayashi M., Itoh K., Suzuki T., Osanai H., Nishikawa K., Katoh Y., Takeagi, Y., and Yamamoto, M. (2002) Identification of the interactive interface and phylogenetic conservation of the Nrf2-Keap1 system. *Genes to Cells* *7*, 807-20.
- (4) Hahn, M. E., Timme-Laragy, A. R., Karchner, S. I., and Stegeman, J. J. (2015) Nrf and Nrf2-related proteins in development and developmental toxicity: insights from studies in zebrafish (*Danio rerio*). *Free Radical Biology and Medicine* *88*, 275–89.
- (5) Hahn, M. E., McArthur, A. G., Karchner, S. I., Franks, D. G., Jenny, M. J., Timme-Laragy, A. R., Steadman, J. J., Woodin, B. R., Cipriano, M. J., and Linney, E. (2014) The transcriptional response to oxidative stress during vertebrate development: effects of *tert*-butylhydroquinone and 2,3,7,8-tetrachlorodibenzo-p-dioxin. *PLoS ONE* *9*, e113158.
- (6) Timme-Laragy, A. R., Karchner, S. I., Franks, D. G., Jenny, M. J., Harbeitner, R. C., Goldstone, J. V., McArthur, A. G., and Hahn, M. E. (2012) Nrf2b, novel zebrafish paralog of oxidant-responsive transcription factor NF-E2-related factor 2 (NRF2). *Journal of Biological Chemistry* *287*, 4609–27.
- (7) Sant, K. E., Hansen, J. M., and Harris C. Tert-butyl-hydroquinone (tBHQ) augments intracellular glutathione concentrations and induces antioxidant gene expression in organogenesis-stage rat conceptuses growing in whole embryo culture (WEC). Presented at American Society for Nutrition Meeting at the Experimental Biology Conference, San Diego, 2012.
